# Supplementary material
Source: publisher figshare collection journal article supplement (https://frontiersin.figshare.com/ndownloader/files/20088461)
Supplement: Supplementary file [file 20088461]

Supplementary Material

Supplementary Figure 1

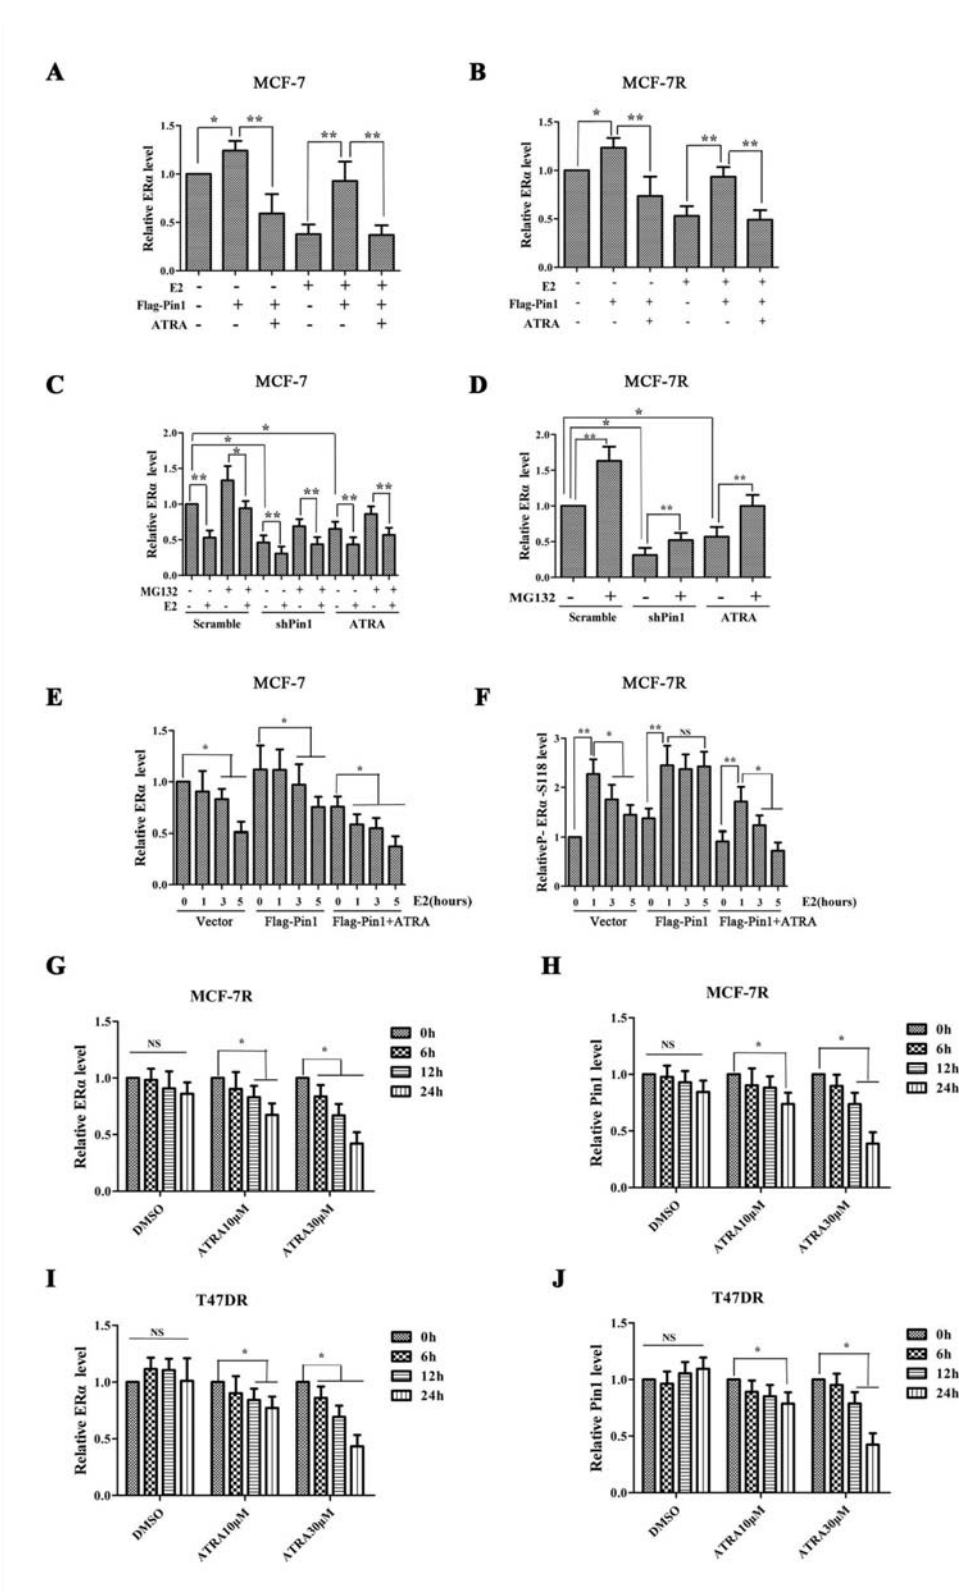

**Supplementary Figure S1. ATRA promotes proteasome-mediated degradation of ER $\alpha$  by blocking Pin1, related to Figure 3.**

**(A, B)** Quantification of ER $\alpha$  protein levels shows that ectopic expression of Pin1 upregulates ER $\alpha$ , but ATRA abrogates the effect. Western blot bands were quantified by densitometric scan and represented as a relative ratio to control samples. Data are represented as means  $\pm$  SD for three independent experiments.  $*P < 0.05$ ,  $**P < 0.01$ .

**(C, D)** Quantification of ER $\alpha$  levels shows that Pin1 knockdown or ATRA treatment promotes ER $\alpha$  degradation.  $*P < 0.05$ ,  $**P < 0.01$ .

**(E, F)** Quantification of ER $\alpha$  and pS118- ER $\alpha$  levels shows that overexpression of Pin1 stabilizes pS118-ER $\alpha$ , but ATRA abrogates the effect.  $*P < 0.05$ ,  $**P < 0.01$ .

**(G-J)** Quantification of ER $\alpha$  and Pin1 levels shows that ATRA promotes Pin1 and ER $\alpha$  degradation in MCF-7R and T47DR cells.  $*P < 0.05$ .

## Supplementary Figure 2

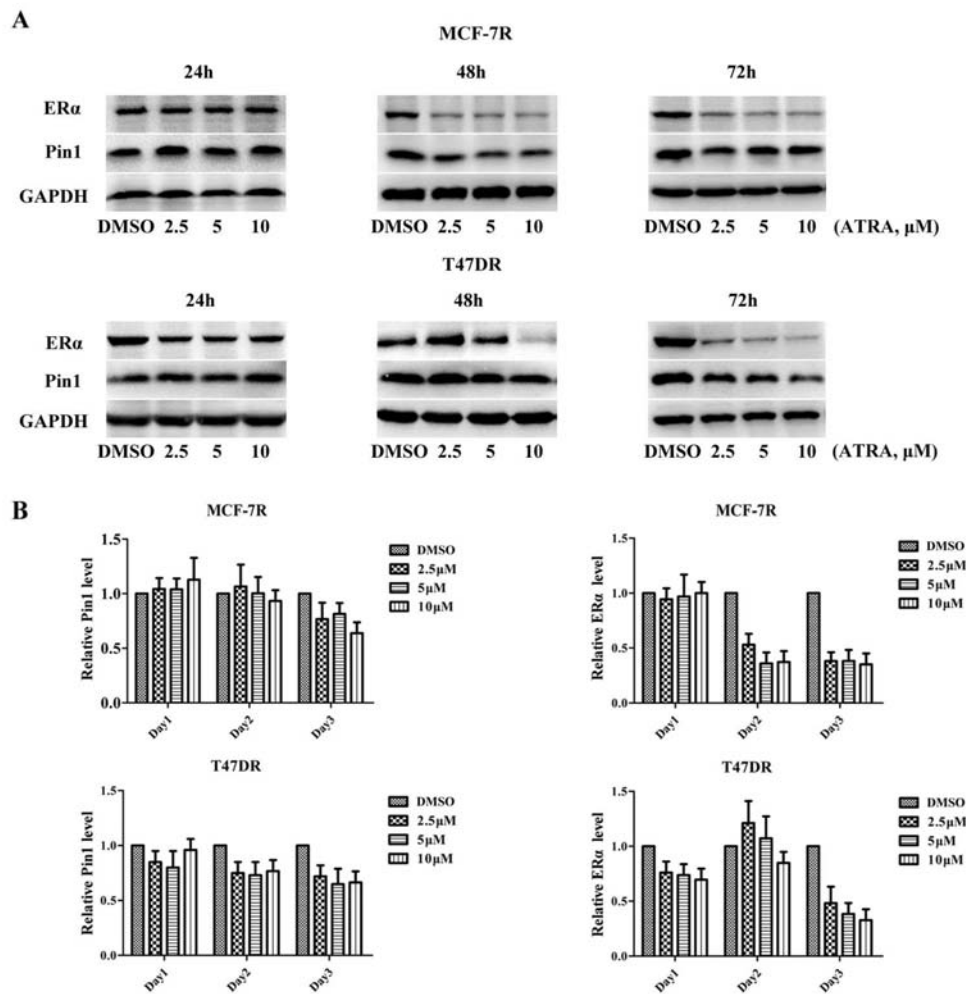

**Supplementary Figure S2. ATRA treatment reduces Pin1 and ERα protein levels in tamoxifen resistant breast cancer cells.**

**(A)** ATRA treatment reduces Pin1 and ERα protein levels. MCF-7R and T47DR cells were treated with increasing doses of ATRA for different length of time before harvesting.

**(B)** Densitometric value of western blot bands were quantified by Image J software.

Data were represented as means ± SD for three independent experiments.

### Supplementary Figure 3

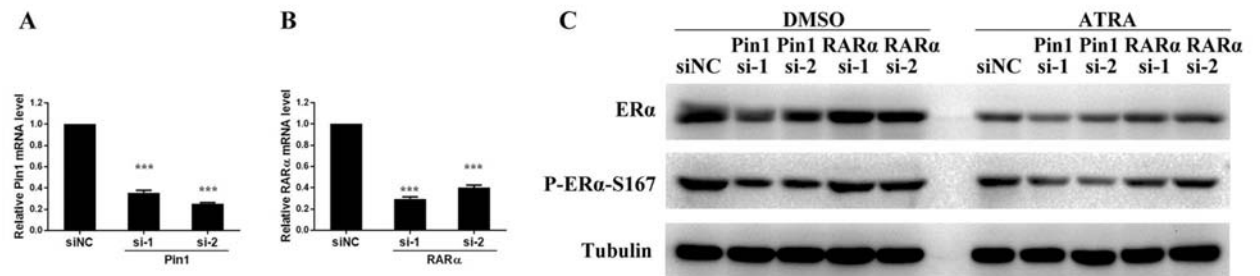

### Supplementary Figure S3. Effects of Pin1 and RARα siRNAs on the level of ERα protein.

(A, B) Bar graphs shows the knockdown efficiency of siRNAs, as detected by qRT-PCR. \*\*\* $P < 0.001$ .

(C) The siRNAs of Pin1, but not RARα reduced the total and phosphorylated levels of ERα in MCF-7R cells.

## Supplementary Figure 4

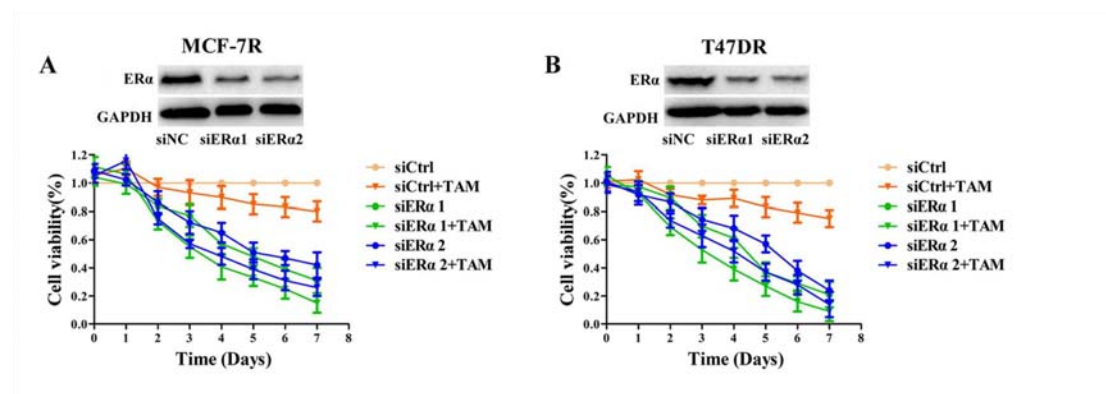

**Supplementary Figure S4. Knocking down ERα inhibits the proliferation of TAMR cells, related to Figure 6.**

(A, B) ERα siRNAs suppresses the proliferation of TAMR cells upon tamoxifen treatment. ERα was knocked down by two siRNAs in MCF-7R and T47DR cells.

## Supplementary Figure 5

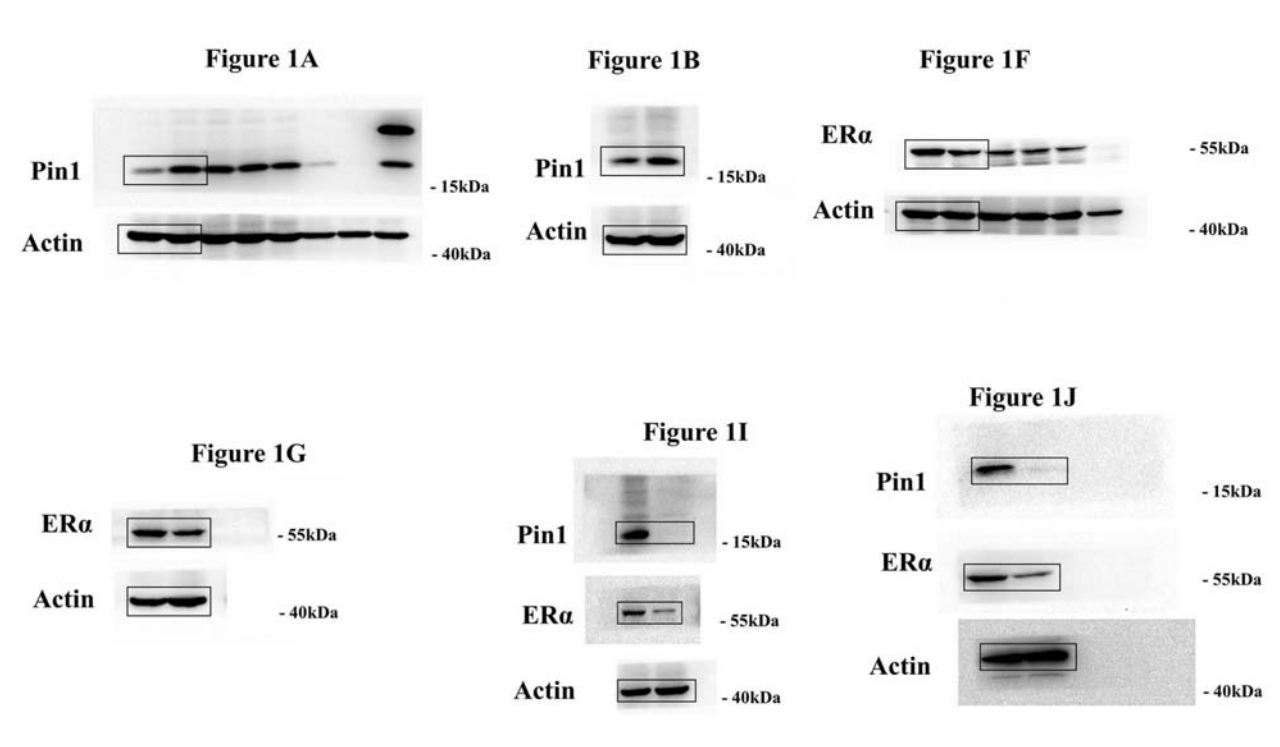

Full images of the blots in Figure 1. Images were obtained using BIO-RAD ChemiDoc XRS+ which directly scanned membranes developed with ECL reagents.

## Supplementary Figure 6

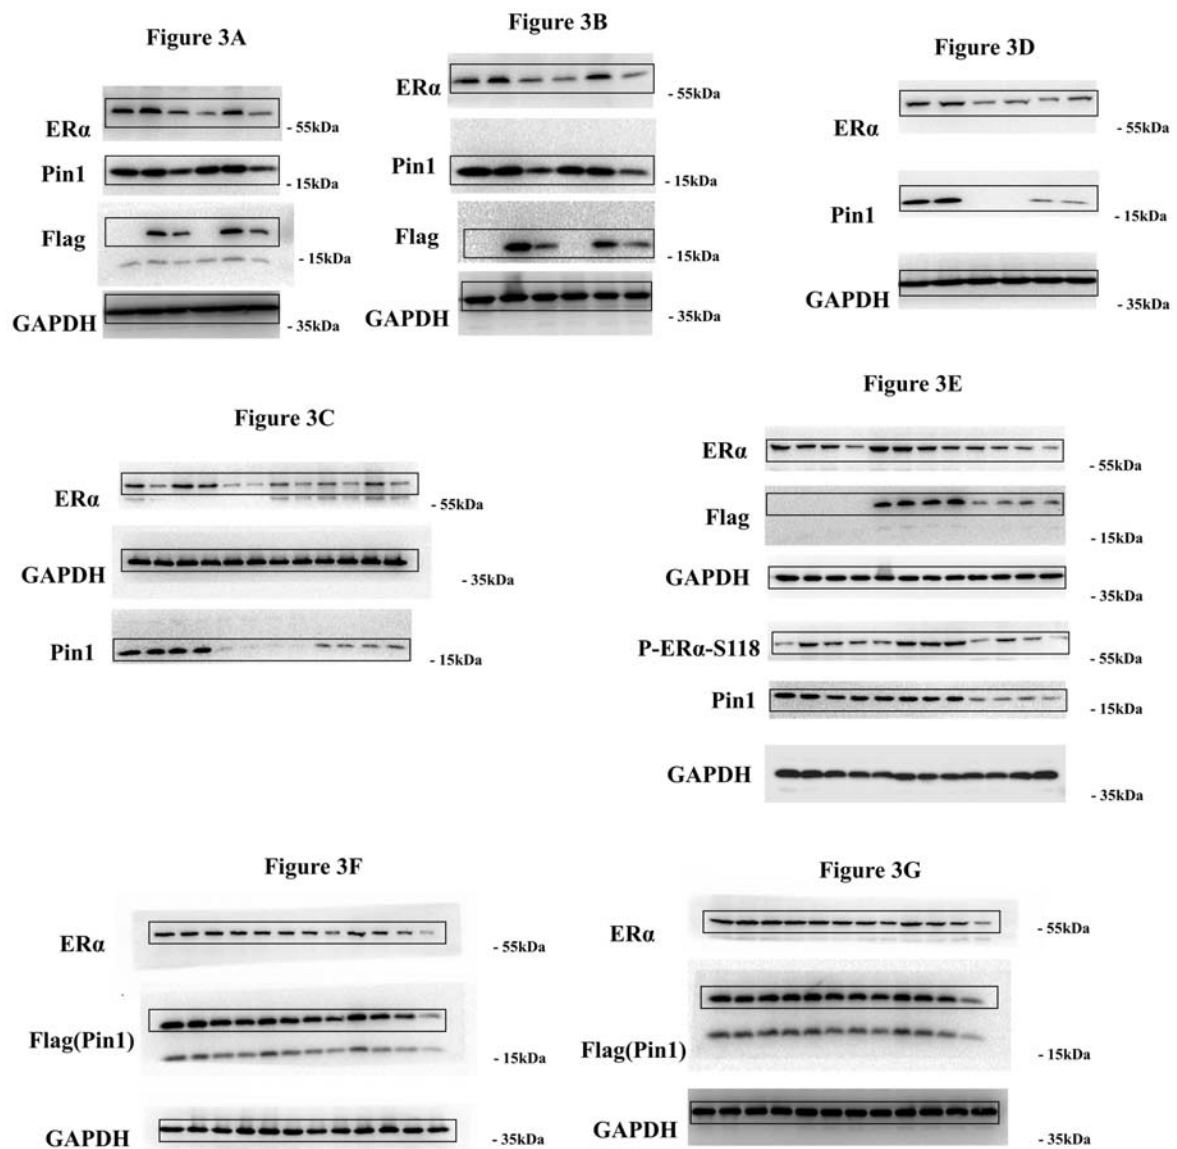

Full images of the blots in Figure 3. Images were obtained using BIO-RAD ChemiDoc XRS+ which directly scanned membranes developed with ECL reagents. The control GAPDH images were re-used in Figure 3E, with the original controls being shown here.

## Supplementary Figure 7

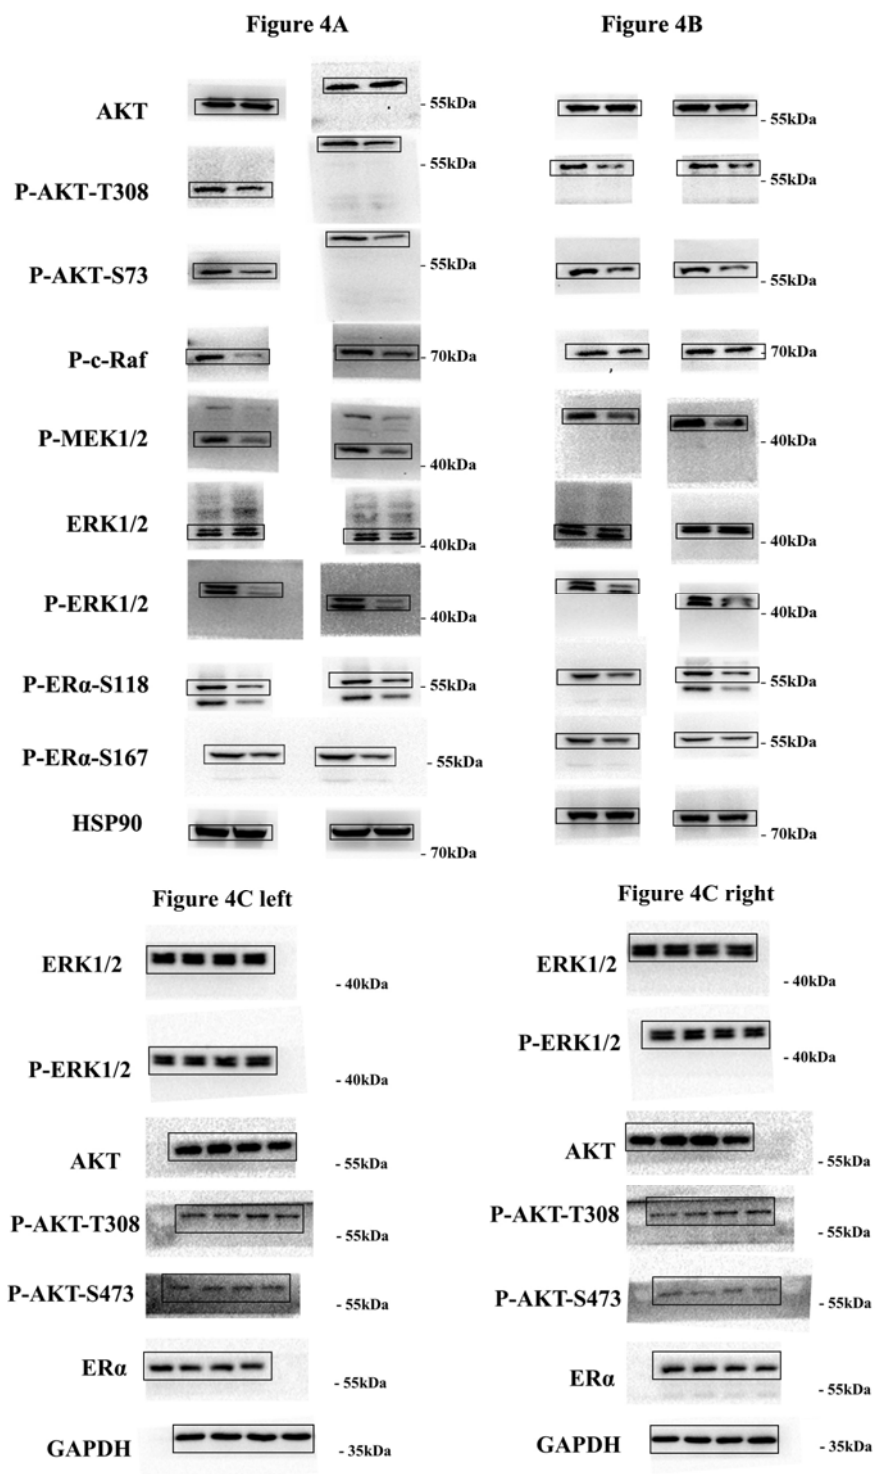

Full images of the blots in Figure 4. Images were obtained using BIO-RAD ChemiDoc XRS+ which directly scanned membranes developed with ECL reagents.



## Supplementary Figure 8

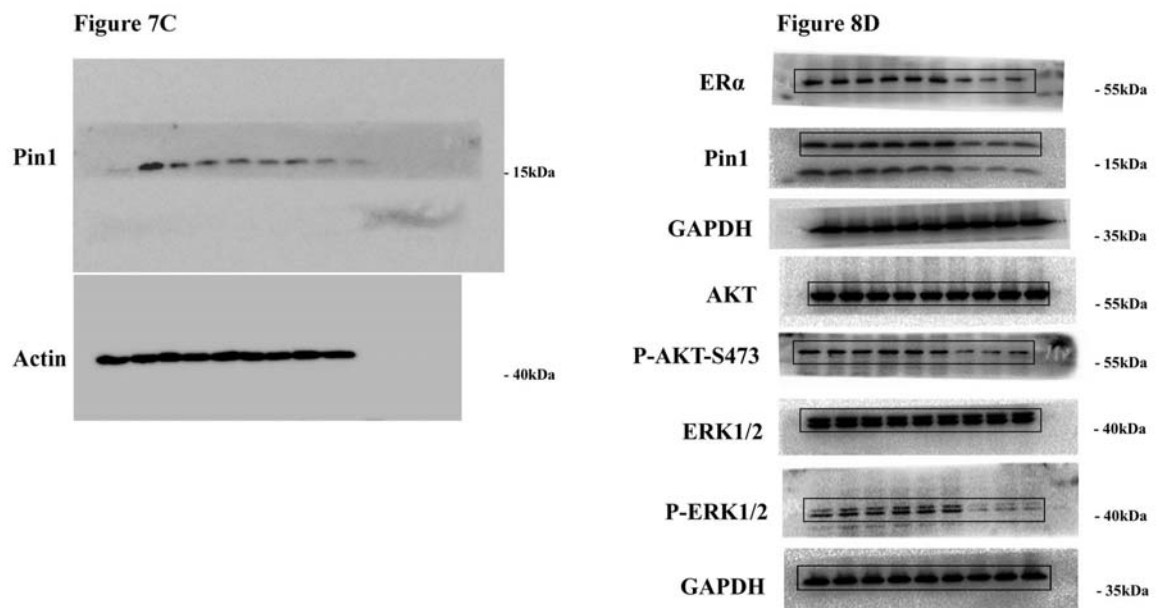

Full images of the blots in Figure 7 and 8. Images were obtained using BIO-RAD ChemiDoc XRS+ which directly scanned membranes developed with ECL reagents. The control GAPDH image was re-used in Figure 8, with the original control being shown here.

## Supplementary Figure 9

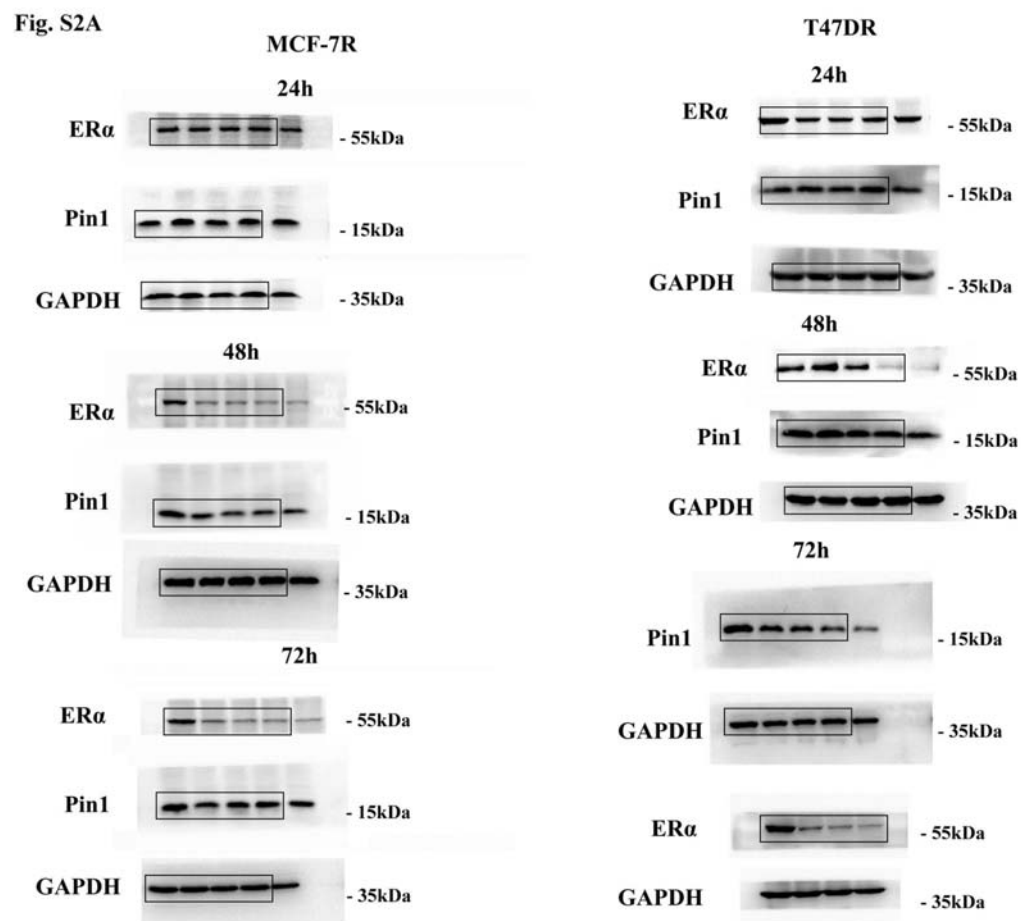

Full images of the blots in Figure S2. Images were obtained using BIO-RAD ChemiDoc XRS+ which directly scanned membranes developed with ECL reagents. The control GAPDH image was re-used in Figure S2A, with the original controls being shown here.

## Supplementary Figure 10

Fig. S3C

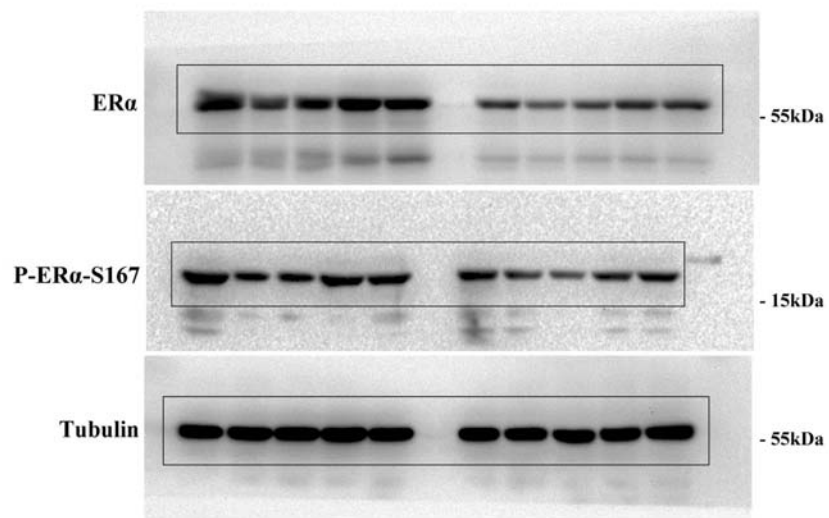

Fig. S4A

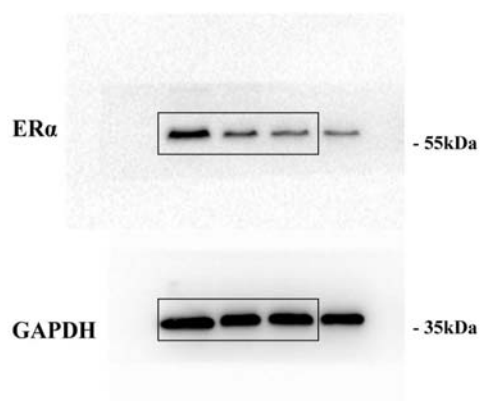

Fig. S4B

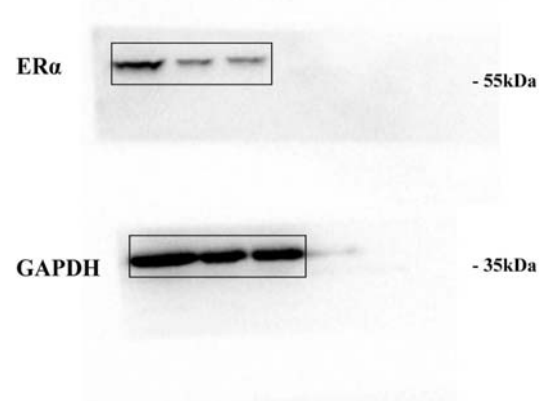

Full images of the blots in Figure S3 and S4. Images were obtained using BIO-RAD ChemiDoc XRS+ which directly scanned membranes developed with ECL reagents.
